# Supplementary material for: Fabrication of thermoresponsive magnetic micelles from amphiphilic poly(phenyl isocyanide) and Fe3O4nanoparticles for controlled drug release and synergistic thermochemotherapy
Source: Royal Society of Chemistry journal article supplement (doi:10.1039/d1py00022e), 2021-01-01
Supplement: d1py00022e1.pdf [file d1py00022e1.pdf]

Electronic Supplementary Information for:

**Fabrication of thermoresponsive magnetic micelles from amphiphilic poly(phenyl isocyanide) and Fe<sub>3</sub>O<sub>4</sub> nanoparticles for controlled drug release and synergistic thermochemotherapy**

Qian Wang<sup>a,b,#</sup>, Jing Xiao<sup>a,#</sup>, Yanhong Su<sup>a</sup>, Jianwen Huang<sup>a</sup>, Jihua Li<sup>a</sup>, Lige Qiu<sup>a</sup>,

Meixiao Zhan<sup>a</sup>, Xu He<sup>a,\*</sup>, Weizhong Yuan<sup>b,\*</sup>, Yong Li<sup>a,\*</sup>

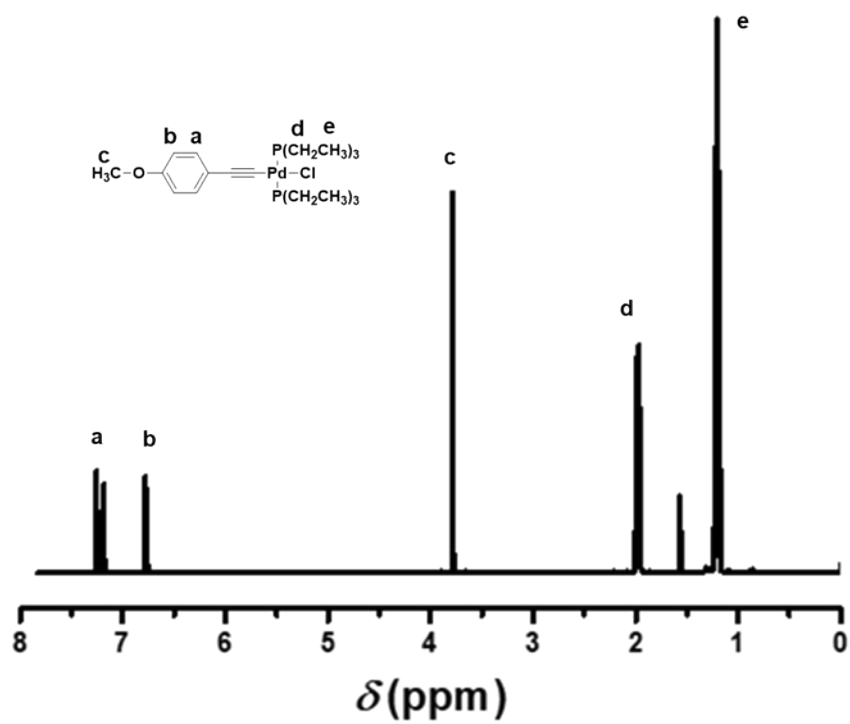

**Fig. S1**  $^1\text{H}$  NMR (600 MHz) spectrum of Pd(II) catalyst (3) measured in  $\text{CDCl}_3$  at 25  $^\circ\text{C}$ .

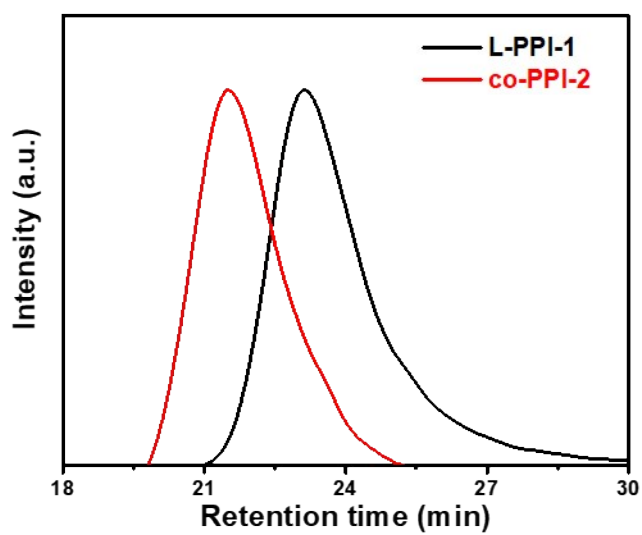

**Fig. S2** GPC curves of L-PPI-1 and co-PPI-2 polymers.

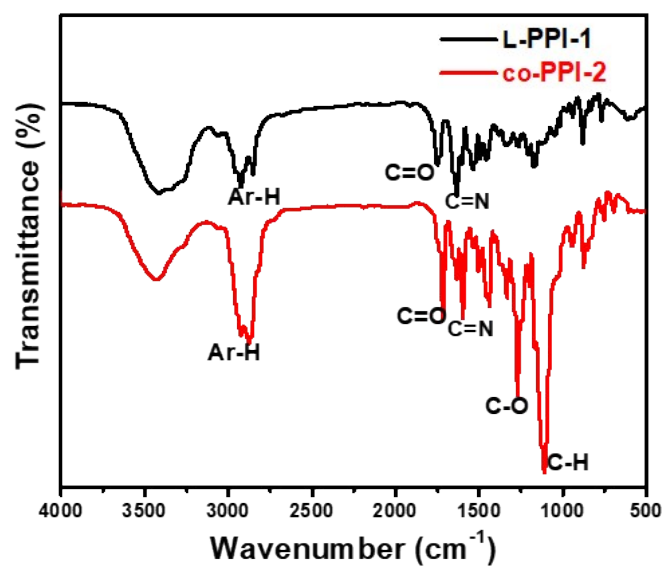

**Fig. S3** FT-IR spectrum measured at 25 °C using KBr pellets.

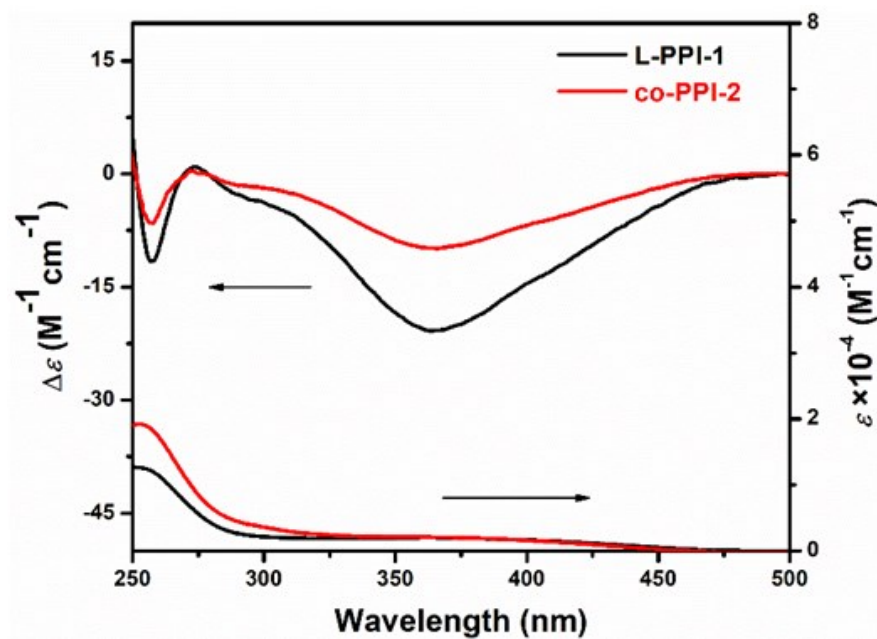

**Fig. S4** CD and absorption spectra of L-PPI-1 and co-PPI-2.

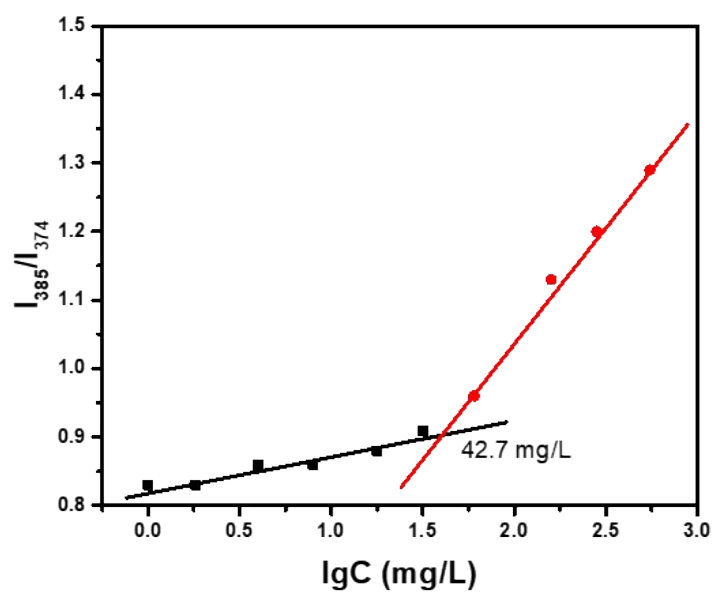

**Fig. S5** Critical micelle concentration (CMC) of co-PPI-2.

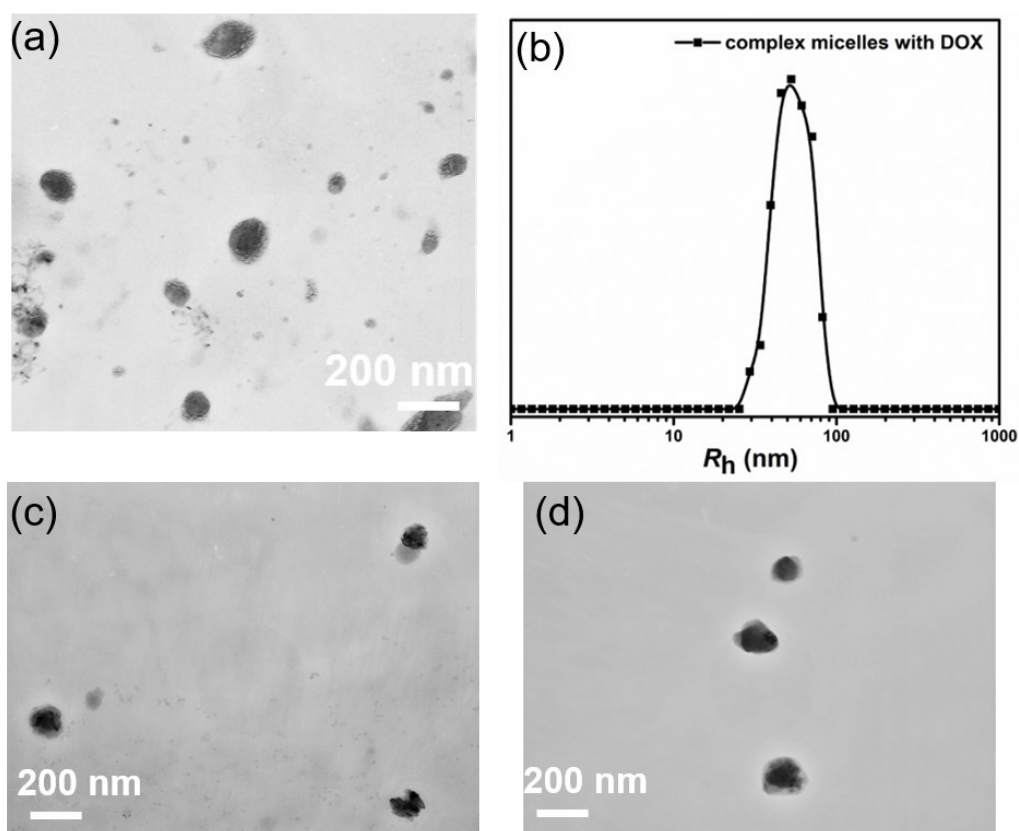

**Fig. S6** TEM images of the micelles loaded with DOX (a), of the magnetic complex micelles(c) and (d) and DLS results (b) of the micelles loaded with DOX.

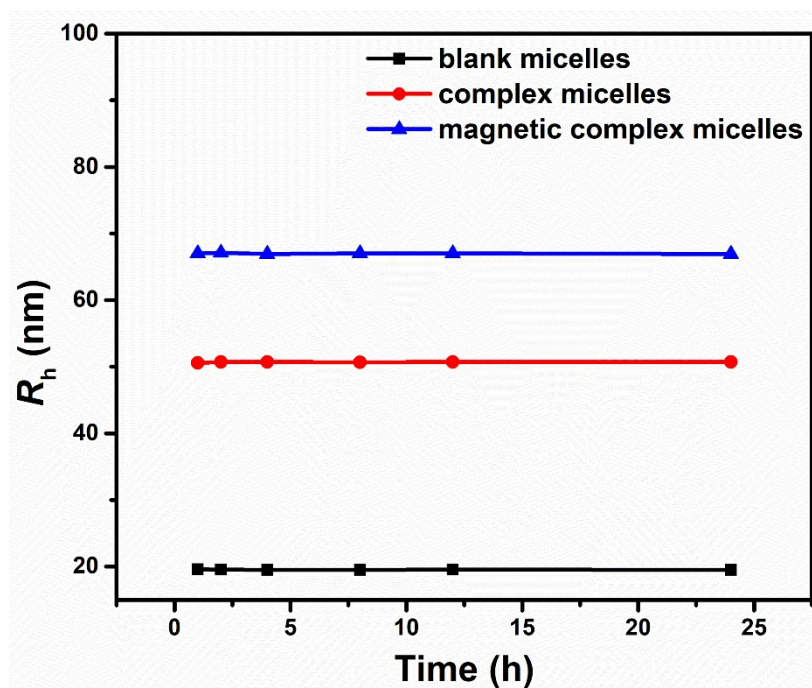

**Fig. S7** Kinetic stability of blank micelles, complex micelles and magnetic complex micelles.

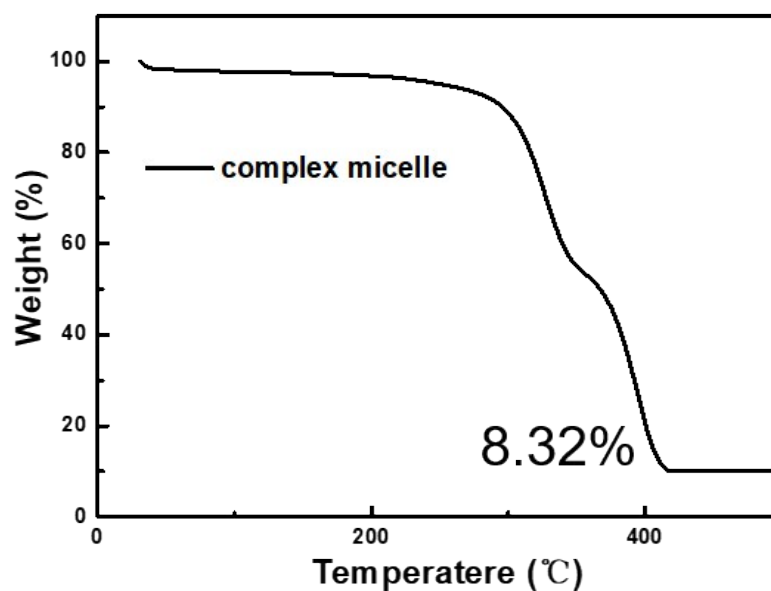

**Fig. S8** TGA curves of the magnetic complex micelles.

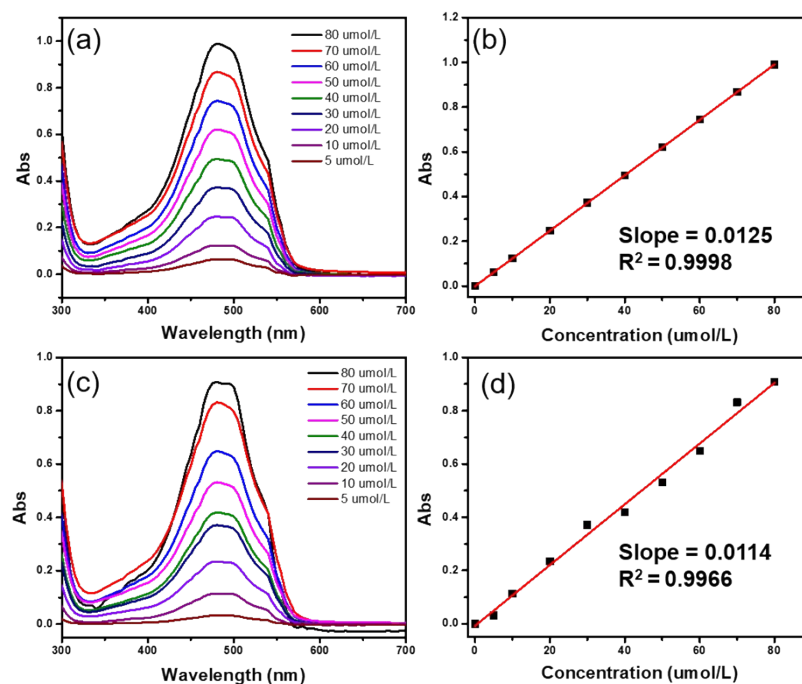

**Fig. S9** UV spectra of DOX at different concentrations in PBS (a) and the standard curve of absorbance vs. concentration of DOX in PBS (b); UV spectra of DOX at different concentrations in THF (c) and the standard curve of absorbance vs. concentration of DOX in THF (d).

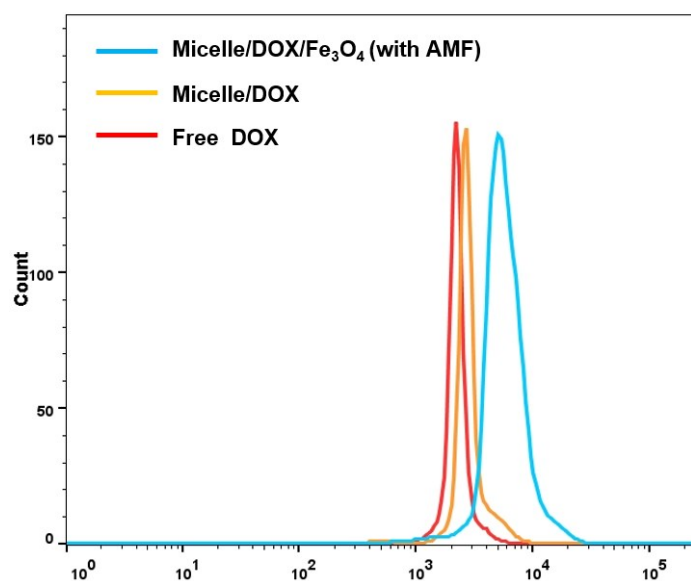

**Fig. S10** Cellular uptake characterized by flow cytometer (FCM).

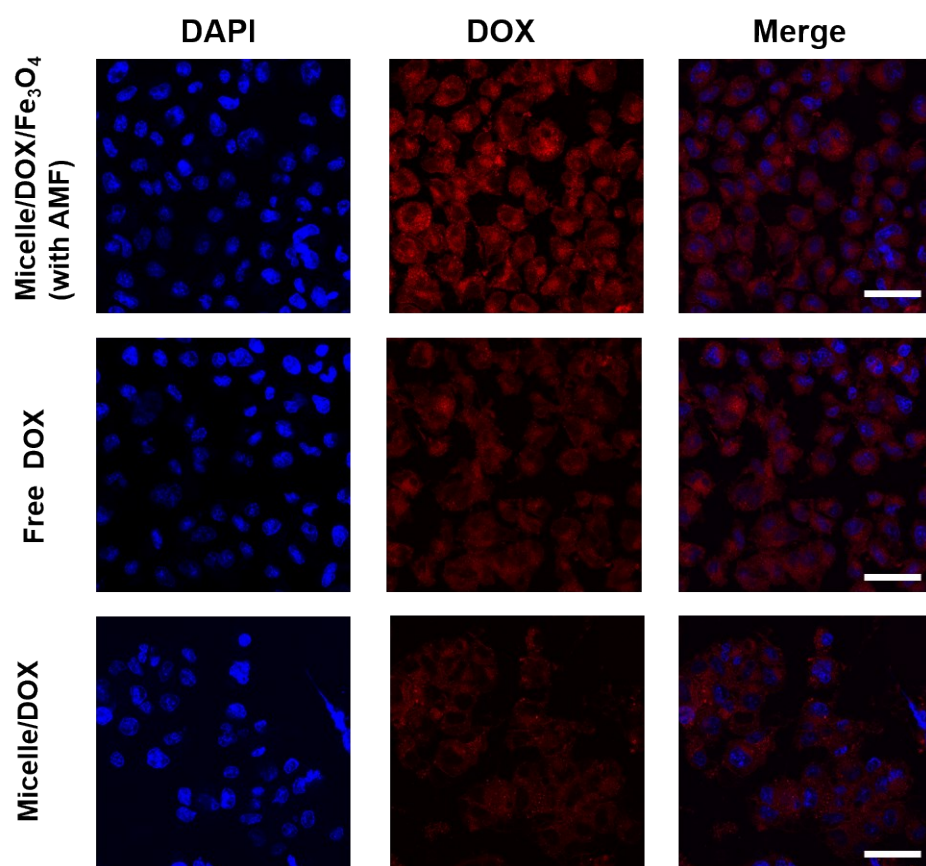

**Fig. S11** Cellular uptake characterized by confocal laser scanning microscopy (CLSM).

## References

1. Z.-Q. Jiang, Y.-X. Xue, J.-L. Chen, Z.-P. Yu, N. Liu, J. Yin, Y.-Y. Zhu, Z.-Q. Wu, *Macromolecules*, 2015, 48, 81–89.
2. T. Nakano, Y. Satoh, Y. Okamoto, *Polym. J.*, 1998, 30, 635–640.
3. Y. Hu, S. Mignani, J.-P. Majoral, M.-W. Shen and X.-Y. Shi, *Chem. Soc. Rev.*, 2018, 47, 1874–1900.
4. Y. Qu, J.-B. Li, J. Ren, J.-Z. Leng, C. Linc and D.-L. Shic, *Nanoscale*, 2014, 6, 12408–12413.
5. R. Jenjob, T. Phakkeeree and D. Crespy. *Biomater. Sci.*, 2020, 8, 2756–2770.
